# Supplementary material for: Factors Associated With Receipt of Cognitive-Behavioral Therapy or Prolonged Exposure Therapy Among Individuals With PTSD
Source: Atypon-hosted journal article supplement (doi:10.1176/appi.ps.201800408), 2019-04-23
Supplement: appi.ps.201800408.ds001.pdf [file appi.ps.201800408.ds001.pdf]

**Figure 1 PRISMA Diagram of Systematic Review**

Figure 1 about here

**Supplementary Table 1 Downs' Risk-of-bias assessment of Studies Included in Systematic Review**

|              | Characteristics of patients clearly described | Distribution of confounds clearly described | Subjects representative of population | Evidence based practice compliance | Adequate Amount adjustment | Confounding | Other bias |
|--------------|-----------------------------------------------|---------------------------------------------|---------------------------------------|------------------------------------|----------------------------|-------------|------------|
| Hundt 2017   | -                                             | -                                           | +                                     | -                                  | +                          | +           |            |
| Hundt 2017b  | +                                             | +                                           | +                                     | -                                  | +                          | +           |            |
| Iverson 2017 | +                                             | +                                           | -                                     | -                                  | -                          | +           |            |
| Kehle 2014   | -                                             | +                                           | +                                     | -                                  | +                          | +           |            |
| Kehle 2016   | -                                             | -                                           | -                                     | -                                  | -                          | +           |            |
| Keller 2016  | +                                             | +                                           | -                                     | -                                  | +                          | +           |            |
| Lamp 2014    | -                                             | +                                           | -                                     | -                                  | -                          | +           |            |
| Lu 2016      | -                                             | -                                           | -                                     | -                                  | -                          | +           |            |
| Maguen 2018  | +                                             | +                                           | -                                     | -                                  | +                          | +           |            |
| Mott 2014    | -                                             | -                                           | -                                     | -                                  | -                          | +           |            |
| Rosen 2017   | +                                             | +                                           | -                                     | +                                  | +                          | +           |            |
| Shalev 2012  | +                                             | +                                           | -                                     | +                                  | -                          | +           |            |
| Shiner 2013  | +                                             | +                                           | -                                     | -                                  | +                          | +           |            |
| Shiner 2018  | -                                             | -                                           | -                                     | -                                  | -                          | +           |            |
| Sripada 2017 | +                                             | +                                           | -                                     | -                                  | -                          | +           |            |
| Sripada 2018 | -                                             | -                                           | -                                     | -                                  | -                          | +           |            |
| Stecker 2013 | -                                             | +                                           | +                                     | -                                  | +                          | +           |            |
| Tuerk 2013   | +                                             | -                                           | -                                     | ?                                  | -                          | +           |            |
| Watts 2014   | +                                             | +                                           | -                                     | -                                  | +                          | +           |            |
| Zayfert 2005 | -                                             | +                                           | +                                     | ?                                  | +                          | +           |            |

  

|              |   |   |   |   |   |   |  |
|--------------|---|---|---|---|---|---|--|
| Baker 2015   | - | - | + | ? | - | + |  |
| Chen 2013    | - | + | + | + | + | + |  |
| DeViva 2017  | - | - | + | - | + | + |  |
| Feeny 2009   | - | - | + | + | + | + |  |
| Grubbs 2015  | - | - | + | - | - | + |  |
| Harnard 2013 | - | + | + | + | + | + |  |

- Low risk of bias  
+ High risk of bias  
? Not sure

**Supplementary Table 2 All Included Studies Assessing Initiation and Engagement of Evidence Based Practices**

| First Author, Year   | Data Collection, Years | Study Group    | Military Era           | Type of Evidence Based Practice |
|----------------------|------------------------|----------------|------------------------|---------------------------------|
| Kehle et al., 2016   | 2013                   | National Guard | OIF                    | PE, SSRI                        |
| Maguen et al., 2018  | 2001-2015              | Veterans       | OIF/OEF                | CPT, PE                         |
| Mott et al., 2014b   | 2008-2012              | Veterans       | OIF/PEF, Gulf, Vietnam | CPT, PE                         |
| Shiner 2018          | 2014-2016              | Veterans       | OIF/PEF, Gulf, Vietnam | CPT, PE                         |
| Sripada et al., 2017 | 2015-2016              | Veterans       | OIF/OEF, Gulf, Vietnam | CPT, PE                         |
| Sripada et al., 2018 | 2015-2016              | Veterans       | OIF/OEF, Gulf, Vietnam | CPT, PE                         |
| Stecker et al., 2013 | 2009-2012              | National Guard | OIF/OEF                | CBT                             |

**Comment [c1]:** Added line to separate and clarify distinction

| VA PTSD Clinic Data                |             |                           |                                     |                            |
|------------------------------------|-------------|---------------------------|-------------------------------------|----------------------------|
| Baker et al., 2015                 | 2008-2012   | Veterans                  | OIF/OEF, Gulf, Vietnam              | CPT, PE                    |
| Hundt et al., 2017                 | 2015-2016   | Veterans                  | OIF/OEF, Gulf, Vietnam              | CPT, PE                    |
| Keller & Tuerk, 2016               | 2015        | Veterans                  | OIF/OEF, Gulf, Vietnam              | CPT, PE                    |
| Kehle et al., 2014                 | 2013        | National Guard            | OIF/OEF                             | PE, SSRI                   |
| Lamp et al., 2014                  | Before 2014 | Veterans                  | OIF/OEF, Gulf, Vietnam              | CPT, PE                    |
| Lu et al., 2016                    | 2008        | Veterans                  | OIF/OEF, Gulf, Vietnam, WWII, Korea | CPT, PE                    |
| Tuerk et al., 2013                 | 2007-2009   | Veterans                  | OIF/OEF, Vietnam                    | PE                         |
| VA New England Repository Data     |             |                           |                                     |                            |
| Shiner et al., 2013                | 2009-2010   | Veterans                  | OIF/OEF, Gulf, Vietnam              | CPT, PE, EMDR, SIT         |
| Watts et al., 2014                 | 2009-2010   | Veterans                  | OIF/OEF, Gulf, Vietnam              | CPT, PE                    |
| Project Specific Military Datasets |             |                           |                                     |                            |
| DeViva et al., 2017                | 2015-2016   | Veterans                  | OIF/OEF, Gulf, Vietnam              | CPT/PE orientation, CPT/PE |
| Grubbs et al., 2015                | 2013-2015   | Veterans                  | OIF/OEF, Gulf, Vietnam              | Telemedicine Outreach, CPT |
| Hundt et al., 2017b                | 2015-2016   | Veterans                  | OIF/OEF, Gulf, Vietnam              | PE                         |
| Iverson et al., 2017               | 2003        | UK Military Personnel     | Iraq War                            | CBT                        |
| Rosen et al., 2017                 | 2015-2016   | Veterans                  | OIF/OEF, Gulf, Vietnam              | CPT, PE                    |
| Civilian Datasets                  |             |                           |                                     |                            |
| Chen et al., 2013                  | 2012-2015   | PTSD Tx Study             | n/a                                 | PE, SSRI                   |
| Feeny et al., 2009                 | 2008-2009   | Convenience               | n/a                                 | PE, SSRI                   |
| Harnard et al., 2013               | 2012-2013   | Behavioral Therapy Clinic | n/a                                 | PE+DB, DB                  |
| Shalev et al., 2012                | 2003-2007   | Emergency Room            | n/a                                 | PE, SSRI                   |
| Zayfert et al., 2005               | 2002-2004   | Anxiety Disorder Clinic   | n/a                                 | CBT                        |

Note: CPT=Cognitive Processing Therapy, CBT=Cognitive Behavioral Therapy, PE=Prolonged Exposure, EMDR=Eye Movement Desensitization and Reprocessing Therapy, SSRI=Selective Serotonin Reuptake Inhibitors, SIT=Stress Inoculation Therapy, DB=Dialectical Behavior Therapy

**Supplementary Table 3 Heterogeneity (n=14 studies)**

| Component                       | Total Sample | # Studies | Heterogeneity $\chi^2$ | Df | p    | $i^2$ |
|---------------------------------|--------------|-----------|------------------------|----|------|-------|
| <b>Demographics</b>             |              |           |                        |    |      |       |
| Age                             | 645407       | 9         | 950.83                 | 7  | .001 | 99.2% |
| Military Era (Vietnam)          | 964          | 3         | 0.41                   | 2  | .816 | 0.0%  |
| Gender (female)                 | 288848       | 8         | 26.13                  | 7  | .001 | 73.2% |
| Race/Ethnicity (Minority/AA)    | 288470       | 9         | 44.24                  | 8  | .001 | 81.9% |
| Marital Status                  | 496          | 4         | 4.06                   | 3  | .255 | 26.2% |
| Income                          | 116          | 2         | 0.03                   | 2  | .866 | 0.0%  |
| Education (HS)                  | 406          | 4         | 4.56                   | 3  | .207 | 34.2% |
| <b>Mental Health Beliefs</b>    |              |           |                        |    |      |       |
| Concerns about stigma           | 58           | 1         | -                      | -  | -    | -     |
| Readiness/ambivalence           | 58           | 1         | -                      | -  | -    | -     |
| Side effects                    | 58           | 1         | -                      | -  | -    | -     |
| Preference for medication       | 58           | 1         | -                      | -  | -    | -     |
| Previous psychotherapy          | 274206       | 5         | 7.22                   | 2  | .125 | 44.6% |
| Trauma-focused interest         | 476          | 1         | -                      | -  | -    | -     |
| <b>Motivators</b>               |              |           |                        |    |      |       |
| Disability claim                | 133          | 1         | -                      | -  | -    | -     |
| <b>Logistic Issues</b>          |              |           |                        |    |      |       |
| Time                            | 58           | 1         | -                      | -  | -    | -     |
| Relocation                      | 58           | 1         | -                      | -  | -    | -     |
| Affordability                   | 58           | 1         | -                      | -  | -    | -     |
| PTSD Service Connection         | 631067       | 3         | 7.46                   | 2  | .02  | 73.2% |
| <b>Organizational Structure</b> |              |           |                        |    |      |       |
| Referral source                 | 61452        | 2         | 0.45                   | 1  | .503 | 0.0%  |
| Staff training                  | 76849        | 4         | 22.74                  | 3  | .001 | 86.8% |
| Staff exposure                  | 693796       | 3         | 107.8                  | 2  | .001 | 98.1% |
| Workflow                        | 63052        | 2         | 102.08                 | 1  | .001 | 99.0% |
| <b>Need</b>                     |              |           |                        |    |      |       |
| PTSD severity                   | 1890         | 8         | 3507.2                 | 7  | .001 | 99.8% |
| Six months delayed treatment    | 274490       | 2         | 4.48                   | 1  | .034 | 77.7% |
| Co-morbid depression            | 288486       | 9         | 487.88                 | 8  | .001 | 98.4% |
| Co-morbid substance misuse      | 287562       | 5         | 17.27                  | 4  | .002 | 76.8% |

Note: AA=African American

**Supplementary Table 4 PRISMA 2009 Checklist**

| Section/topic             | #  | Checklist item                                                                                                                                                                                                                                                                                              | Reported on page # |
|---------------------------|----|-------------------------------------------------------------------------------------------------------------------------------------------------------------------------------------------------------------------------------------------------------------------------------------------------------------|--------------------|
| <b>TITLE</b>              |    |                                                                                                                                                                                                                                                                                                             |                    |
| Title                     | 1  | Identify the report as a systematic review, meta-analysis, or both.                                                                                                                                                                                                                                         | 1                  |
| <b>ABSTRACT</b>           |    |                                                                                                                                                                                                                                                                                                             |                    |
| Structured summary        | 2  | Provide a structured summary including, as applicable: background; objectives; data sources; study eligibility criteria, participants, and interventions; study appraisal and synthesis methods; results; limitations; conclusions and implications of key findings; systematic review registration number. | 1                  |
| <b>INTRODUCTION</b>       |    |                                                                                                                                                                                                                                                                                                             |                    |
| Rationale                 | 3  | Describe the rationale for the review in the context of what is already known.                                                                                                                                                                                                                              | 2-3                |
| Objectives                | 4  | Provide an explicit statement of questions being addressed with reference to participants, interventions, comparisons, outcomes, and study design (PICOS).                                                                                                                                                  | 3                  |
| <b>METHODS</b>            |    |                                                                                                                                                                                                                                                                                                             |                    |
| Protocol and registration | 5  | Indicate if a review protocol exists, if and where it can be accessed (e.g., Web address), and, if available, provide registration information including registration number.                                                                                                                               | 1                  |
| Eligibility criteria      | 6  | Specify study characteristics (e.g., PICOS, length of follow-up) and report characteristics (e.g., years considered, language, publication status) used as criteria for eligibility, giving rationale.                                                                                                      | 4                  |
| Information sources       | 7  | Describe all information sources (e.g., databases with dates of coverage, contact with study authors to identify additional studies) in the search and date last searched.                                                                                                                                  | 4                  |
| Search                    | 8  | Present full electronic search strategy for at least one database, including any limits used, such that it could be repeated.                                                                                                                                                                               | 4                  |
| Study selection           | 9  | State the process for selecting studies (i.e., screening, eligibility, included in systematic review, and, if applicable, included in the meta-analysis).                                                                                                                                                   | 4-5                |
| Data collection           | 10 | Describe method of data extraction from reports (e.g., piloted forms, independently, in                                                                                                                                                                                                                     | 4-5                |

|                                    |    |                                                                                                                                                                                                                        |                |
|------------------------------------|----|------------------------------------------------------------------------------------------------------------------------------------------------------------------------------------------------------------------------|----------------|
| process                            |    | duplicate) and any processes for obtaining and confirming data from investigators.                                                                                                                                     |                |
| Data items                         | 11 | List and define all variables for which data were sought (e.g., PICOS, funding sources) and any assumptions and simplifications made.                                                                                  | 4-5            |
| Risk of bias in individual studies | 12 | Describe methods used for assessing risk of bias of individual studies (including specification of whether this was done at the study or outcome level), and how this information is to be used in any data synthesis. | 5, Supp        |
| Summary measures                   | 13 | State the principal summary measures (e.g., risk ratio, difference in means).                                                                                                                                          | 5              |
| Synthesis of results               | 14 | Describe the methods of handling data and combining results of studies, if done, including measures of consistency (e.g., $I^2$ ) for each meta-analysis.                                                              | 5              |
| Risk of bias across studies        | 15 | Specify any assessment of risk of bias that may affect the cumulative evidence (e.g., publication bias, selective reporting within studies).                                                                           | 5              |
| Additional analyses                | 16 | Describe methods of additional analyses (e.g., sensitivity or subgroup analyses, meta-regression), if done, indicating which were pre-specified.                                                                       | 10             |
| <b>RESULTS</b>                     |    |                                                                                                                                                                                                                        |                |
| Study selection                    | 17 | Give numbers of studies screened, assessed for eligibility, and included in the review, with reasons for exclusions at each stage, ideally with a flow diagram.                                                        | Fig 2          |
| Study characteristics              | 18 | For each study, present characteristics for which data were extracted (e.g., study size, PICOS, follow-up period) and provide the citations.                                                                           | Tab. 1         |
| Risk of bias within studies        | 19 | Present data on risk of bias of each study and, if available, any outcome level assessment (see item 12).                                                                                                              | 5, Supp        |
| Results of individual studies      | 20 | For all outcomes considered (benefits or harms), present, for each study: (a) simple summary data for each intervention group (b) effect estimates and confidence intervals, ideally with a forest plot.               | Tab. 5, p 7-10 |
| Synthesis of results               | 21 | Present results of each meta-analysis done, including confidence intervals and measures of consistency.                                                                                                                | Tab. 5, p 7-10 |
| Risk of bias                       | 22 | Present results of any assessment of risk of bias across studies (see Item 15).                                                                                                                                        | 5, Supp        |

## across studies

|                     |    |                                                                                                                       |    |
|---------------------|----|-----------------------------------------------------------------------------------------------------------------------|----|
| Additional analysis | 23 | Give results of additional analyses, if done (e.g., sensitivity or subgroup analyses, meta-regression [see Item 16]). | 10 |
|---------------------|----|-----------------------------------------------------------------------------------------------------------------------|----|

## DISCUSSION

|                     |    |                                                                                                                                                                                      |       |
|---------------------|----|--------------------------------------------------------------------------------------------------------------------------------------------------------------------------------------|-------|
| Summary of evidence | 24 | Summarize the main findings including the strength of evidence for each main outcome; consider their relevance to key groups (e.g., healthcare providers, users, and policy makers). | 11-12 |
|---------------------|----|--------------------------------------------------------------------------------------------------------------------------------------------------------------------------------------|-------|

|             |    |                                                                                                                                                               |       |
|-------------|----|---------------------------------------------------------------------------------------------------------------------------------------------------------------|-------|
| Limitations | 25 | Discuss limitations at study and outcome level (e.g., risk of bias), and at review-level (e.g., incomplete retrieval of identified research, reporting bias). | 13-14 |
|-------------|----|---------------------------------------------------------------------------------------------------------------------------------------------------------------|-------|

|             |    |                                                                                                                         |       |
|-------------|----|-------------------------------------------------------------------------------------------------------------------------|-------|
| Conclusions | 26 | Provide a general interpretation of the results in the context of other evidence, and implications for future research. | 12-13 |
|-------------|----|-------------------------------------------------------------------------------------------------------------------------|-------|

## FUNDING

|         |    |                                                                                                                                            |    |
|---------|----|--------------------------------------------------------------------------------------------------------------------------------------------|----|
| Funding | 27 | Describe sources of funding for the systematic review and other support (e.g., supply of data); role of funders for the systematic review. | 14 |
|---------|----|--------------------------------------------------------------------------------------------------------------------------------------------|----|

---

Note: Moher D, Liberati A, Tetzlaff J, Altman DG, The PRISMA Group (2009). Preferred Reporting Items for Systematic Reviews and Meta-Analyses: The PRISMA Statement. PLoS Med 6(7): e1000097. doi:10.1371/journal.pmed1000097. Supp=Online Supplement
